# Supplementary material
Source: publisher site journal article supplement (https://www.e-cmh.org/upload/media/cmh-2023-0131-Supplementary-Table-4.pdf)
Supplement: Supplementary file 1 [file cmh-2023-0131-Supplementary-Table-4.pdf]

**Supplementary Table 4.** Node-splitting analysis of inconsistency between direct and indirect effects in a closed loop network (PEI-PAI-RFA) in terms of overall survival and local progression-free survival

| Nodes                           | Direct effect          | Indirect effect       | Overall (network)      | P-value |
|---------------------------------|------------------------|-----------------------|------------------------|---------|
| Overall survival                |                        |                       |                        |         |
| PAI, PEI                        | -0.45 (-1.2 to 0.31)   | 0.44 (-0.56 to 1.5)   | -0.18 (-0.73 to 0.57)  | 0.146   |
| PAI, RFA                        | -0.06 (-1.0 to 0.87)   | -0.97 (-1.9 to -0.16) | -0.62 (-1.2 to 0.09)   | 0.141   |
| PEI, RFA                        | -0.51 (-0.97 to -0.16) | 0.38 (-0.85 to 1.5)   | -0.44 (-0.88 to -0.08) | 0.134   |
| Local progression-free survival |                        |                       |                        |         |
| PAI, PEI                        | 0.047 (-1.5 to 1.7)    | 0.15 (-1.7 to 2.2)    | 0.07 (-0.88 to 1.1)    | 0.916   |
| PAI, RFA                        | -0.87 (-2.6 to 0.82)   | -1.0 (-3.0 to 0.86)   | -0.94 (-2.0 to 0.06)   | 0.891   |
| PEI, RFA                        | -1.1 (-2.1 to -0.11)   | -0.92 (-3.2 to 1.4)   | -1.0 (-1.8 to -0.31)   | 0.880   |

RFA, radiofrequency ablation; PEI, percutaneous ethanol injection; PAI, percutaneous acetic acid injections.
